# Supplementary material
Source: HighWire-hosted journal article supplement (https://bmjopen.bmj.com/content/8/4/e021147)
Supplement: inline-supplementary-material-1 [file inline-supplementary-material-1.pdf]

## Appendix 1: Top 5 causes of death by disease trajectory

|   | <b>Terminal Illness</b>                    | <b>Organ Failure</b>                                                | <b>Frailty</b>                                    | <b>Sudden Death</b>                                                                                                  | <b>Other</b>                                                        |
|---|--------------------------------------------|---------------------------------------------------------------------|---------------------------------------------------|----------------------------------------------------------------------------------------------------------------------|---------------------------------------------------------------------|
| 1 | Bronchus and Lung Cancer; N=17,883 (23.6%) | Other chronic obstructive pulmonary disease; N=8,944 (12.4%)        | Chronic ischaemic heart disease; N=19,424 (28.8%) | Intentional self-harm by hanging, strangulation and suffocation; N=1,047 (13.4%)                                     | Other septicaemia; N=2,735 (23.2%)                                  |
| 2 | Colon cancer; N=5,597 (7.4%)               | Stroke, not specified as haemorrhage or infarction; N=7,233 (10.0%) | Acute myocardial infarction; N=13,249 (19.6%)     | Accidental poisoning by and exposure to narcotics and hallucinogens; N=714 (9.1%)                                    | Unspecified fall; N=2,329 (19.8%)                                   |
| 3 | Breast Cancer; N=5,250 (6.9%)              | Unspecified diabetes mellitus; N=4,937 (6.8%)                       | Unspecified dementia; N=12,025 (17.8%)            | Accidental poisoning by and exposure to other unspecified drugs, medicaments and biological substances; N=394 (5.0%) | Other fall on same level; N=1,737 (14.7%)                           |
| 4 | Pancreatic Cancer; N=4,140 (5.5%)          | Heart failure; N=3,308 (4.6%)                                       | Alzheimer's disease; N=5,761 (8.5%)               | Exposure to unspecified factor; N=347 (4.4%)                                                                         | Other ill-defined and unspecified causes of mortality; N=891 (7.6%) |
| 5 | Prostate Cancer; N=3,816 (5.0%)            | Other interstitial pulmonary diseases; N=2,289 (3.2%)               | Pneumonia, organism unspecified; N=4,851 (7.2%)   | Motor- or nonmotor-vehicle accident; N=335 (4.3%)                                                                    | Fall on and from stairs and steps; N=541 (4.6%)                     |
